# Supplementary material for: Associations between WTAP gene polymorphisms and neuroblastoma susceptibility in Chinese children
Source: PubMed Central journal article supplement — Transl Pediatr. 2021 Jan;10(1):146–52. doi: 10.21037/tp-20-168 (PMC7882302; doi:10.21037/tp-20-168), 2021-01
Supplement: tp-10-01-146-dss.pdf [file tp-10-01-146-dss.pdf]

## Data Sharing Statement

|                     |                                                                                                                                                    |                                                                                                                  |
|---------------------|----------------------------------------------------------------------------------------------------------------------------------------------------|------------------------------------------------------------------------------------------------------------------|
| <b>Article Info</b> | http://dx.doi.org/10.21037/tp-20-168.                                                                                                              |                                                                                                                  |
| <b>Item</b>         | <b>Question</b>                                                                                                                                    | <b>Authors' Response</b><br>(place "-" if not applicable)                                                        |
| 1                   | Would you like to share data collected for your study to others?                                                                                   | Yes.                                                                                                             |
| 2                   | If not, would you like to share the reason for your decision?                                                                                      | -                                                                                                                |
| 3                   | What data in particular will be shared?                                                                                                            | Patient demographics and clinical characteristics.                                                               |
| 4                   | Any other documents will be share? Such as study protocol, statistical analysis plan, informed consent form, clinical study report, analytic code. | Statistical analysis plan, informed consent form, and clinical study report will also be shared if requested.    |
| 5                   | When will data availability begin?                                                                                                                 | From the publication date.                                                                                       |
| 6                   | When will data availability end?                                                                                                                   | Two years since the publication date.                                                                            |
| 7                   | To whom will you share the data?                                                                                                                   | Researchers who are interested in cancer genetics.                                                               |
| 8                   | For what type of analysis or purpose?                                                                                                              | For further evaluation of SNP in neuroblastoma.                                                                  |
| 9                   | How or where can the data/documents be obtained?                                                                                                   | Requests should be directed to the corresponding author's email provided.                                        |
| 10                  | Any other restrictions?                                                                                                                            | We may balance the potential benefits and risks for each request and then provide the data that could be shared. |
