# Supplementary material for: Associations between WTAP gene polymorphisms and neuroblastoma susceptibility in Chinese children
Source: PubMed Central journal article supplement — Transl Pediatr. 2021 Jan;10(1):146–52. doi: 10.21037/tp-20-168 (PMC7882302; doi:10.21037/tp-20-168), 2021-01
Supplement: tp-10-01-146-supplementary.pdf [file tp-10-01-146-supplementary.pdf]

**Table S1** Frequency distribution of selected characteristics in neuroblastoma cases and cancer-free controls

| Variables              | Combined subjects (8 Centers) |       |                   |       | P <sup>a</sup> |
|------------------------|-------------------------------|-------|-------------------|-------|----------------|
|                        | Cases (N=898)                 |       | Controls (N=1734) |       |                |
|                        | No.                           | %     | No.               | %     |                |
| Age range, month       | 0.00-176.00                   |       | 0.004-156.00      |       | 0.155          |
| Mean ± SD              | 33.11±28.07                   |       | 30.41±24.90       |       |                |
| ≤18                    | 344                           | 38.31 | 714               | 41.18 |                |
| >18                    | 554                           | 61.69 | 1020              | 58.82 |                |
| Gender                 |                               |       |                   |       | 0.236          |
| Female                 | 407                           | 45.32 | 744               | 42.91 |                |
| Male                   | 491                           | 54.68 | 990               | 57.09 |                |
| INSS stages            |                               |       |                   |       |                |
| I                      | 310                           | 34.52 | /                 | /     |                |
| II                     | 160                           | 17.82 | /                 | /     |                |
| III                    | 163                           | 18.15 | /                 | /     |                |
| IV                     | 231                           | 25.72 | /                 | /     |                |
| 4s                     | 18                            | 2.00  | /                 | /     |                |
| NA                     | 16                            | 1.78  | /                 | /     |                |
| Sites of origin        |                               |       |                   |       |                |
| Adrenal gland          | 248                           | 27.62 | /                 | /     |                |
| Retroperitoneal region | 319                           | 35.52 | /                 | /     |                |
| Mediastinum            | 214                           | 23.83 | /                 | /     |                |
| Other region           | 105                           | 11.69 | /                 | /     |                |
| NA                     | 12                            | 1.34  | /                 | /     |                |

SD, standard deviation; NA, not available. <sup>a</sup> Two-sided  $\chi^2$  test for distributions between neuroblastoma cases and cancer-free controls.
